# Supplementary material for: Clinic-Based Financial Coaching and Missed Pediatric Preventive Care: A Randomized Trial
Source: Oxford University Press journal article supplement (doi:10.1542/peds.2021-054970), 2023-02-02
Supplement: peds_2021054970supplementarydata.pdf [file peds_2021054970supplementarydata.pdf]

## Supplemental Information

**DIRECTIONS:** Please respond to the questions below by checking one box per row or question. Your responses will help Harbor-UCLA improve care. You may opt out. Please follow the instructions for obtaining information on useful resources based on your answers. Talk with your health care team about your answers.

[Patient Sticker]

| Respond to the questions below by checking No or Yes in each row                                                                                   | No                          | Yes                          | Instructions                                                                                                                                                                      |
|----------------------------------------------------------------------------------------------------------------------------------------------------|-----------------------------|------------------------------|-----------------------------------------------------------------------------------------------------------------------------------------------------------------------------------|
| <b>Rent &amp; Housing</b><br>1. Are you worried or concerned that in the next two months you may not have stable housing?                          | <input type="checkbox"/> No | <input type="checkbox"/> Yes | <b>Yes → If you checked "yes", take a copy of the Red Rent &amp; Housing sheet from the rainbow-colored rack in the waiting area or exam room</b>                                 |
| <b>Utility bills</b><br>2. In the past year, has the electric, gas, or water company shut off or threatened to shut off services in your home?     | <input type="checkbox"/> No | <input type="checkbox"/> Yes | <b>Yes → If you checked "yes", take a copy of the Orange Utilities resource sheet from the rainbow-colored rack in the waiting area or exam room</b>                              |
| <b>Employment &amp; Education</b><br>3. Do you want help finding or keeping work, a job, a school, or training?                                    | <input type="checkbox"/> No | <input type="checkbox"/> Yes | <b>Yes → If you checked "yes", take a copy of the Yellow Employment &amp; Education resource sheet from the rainbow-colored rack in the waiting area or exam room</b>             |
| <b>Financial Services &amp; Income Support</b><br>4. In the past year, have you ever had trouble making ends meet at the end of the month?         | <input type="checkbox"/> No | <input type="checkbox"/> Yes | <b>Yes → If you checked "yes", take a copy of the Green Financial Services &amp; Income Support resource sheet from the rainbow-colored rack in the waiting area or exam room</b> |
| <b>Food</b><br>5. In the past year, were you ever worried your food would run out before you got money to buy more?                                | <input type="checkbox"/> No | <input type="checkbox"/> Yes | <b>Yes → If you checked "yes", take a copy of the Blue Food &amp; Transportation resource sheet from the rainbow-colored rack in the waiting area or exam room</b>                |
| <b>Transportation</b><br>6. In the past year, has lack of transportation kept you from medical appointments, work or necessities for daily living? | <input type="checkbox"/> No | <input type="checkbox"/> Yes | <b>Yes → If you checked "yes", take a copy of the Blue Food &amp; Transportation resource sheet from the rainbow-colored rack in the waiting area or exam room</b>                |
| <b>Legal Services</b><br>7. Would you like legal guidance or help?                                                                                 | <input type="checkbox"/> No | <input type="checkbox"/> Yes | <b>Yes → If you checked "yes", take a Purple Legal resource sheet from the rainbow rack in the waiting area or exam room</b>                                                      |
| <b>Child Care or Child Care Supplies (diapers, formula, etc)</b><br>8. Do you want help finding child care, supplies, or activities?               | <input type="checkbox"/> No | <input type="checkbox"/> Yes | <b>Yes → If you checked "yes", take a Gray Child Care list from the rainbow rack in waiting area or exam room</b>                                                                 |

### SUPPLEMENTAL FIGURE 4
